# Supplementary material
Source: PubMed Central journal article supplement (PMC4724093)
Supplement: supp_kwv198_kwv198supp.pdf [file supp_kwv198_kwv198supp.pdf]

# **Supplement to “Tests for Gene-Environment Interactions and Joint Effects with Exposure Misclassification”**

Running head: GxE Interactions with Exposure Misclassification

PHILIP S. BOONSTRA, BHARAMAR MUKHERJEE\*, STEPHEN B. GRUBER, JAEIL AHN,  
STEPHANIE L. SCHMIT, NILANJAN CHATTERJEE.

\* Correspondence to Dr. Bhramar Mukherjee, Department of Biostatistics, School of Public Health, University of Michigan, 1415 Washington Heights, Ann Arbor, MI 48109-2029, (e-mail: bhramar{at}umich.edu).

## Web Appendix 1

In the following algebraic development, we develop exact expressions for the log-odds ratios  $\beta_E$ ,  $\beta_G$ , and  $\beta_{GE}$  as functions of the quantities  $\alpha_G$ ,  $\alpha_E$ ,  $\theta_{GE}$ ,  $P_G \equiv \Pr(G = 1|D = 0)$ , and  $P_E \equiv \Pr(E = 1|D = 0)$ . As given in the text, the control probabilities relate to  $\theta_{GE}$ ,  $P_G$ , and  $P_E$  according to

$$\exp\{\theta_{GE}\} = \frac{p_{000}(p_{000} - (1 - P_G - P_E))}{(1 - P_G - p_{000})(1 - P_E - p_{000})},$$

$$p_{001} = 1 - P_G - p_{000}, \quad p_{010} = 1 - P_E - p_{000}.$$

The case probabilities are then given by  $p_{100} \propto p_{000}$ ,  $p_{101} \propto \exp\{\beta_E\}p_{001}$ ,  $p_{110} \propto \exp\{\beta_G\}p_{010}$ , and  $p_{111} \propto \exp\{\beta_E + \beta_G + \beta_{GE}\}p_{011}$ , normalized to sum to one. Thus, the marginal log-ORs,  $\alpha_G$  and  $\alpha_E$ , are written as

$$\begin{aligned} \alpha_G &= \log\left(\frac{p_{111} + p_{110}}{p_{101} + p_{100}}\right) + \log\left(\frac{p_{001} + p_{000}}{p_{011} + p_{010}}\right) \\ &= \log\left(\frac{\exp\{\beta_E + \beta_G + \beta_{GE}\}p_{011} + \exp\{\beta_G\}p_{010}}{\exp\{\beta_E\}p_{001} + p_{000}}\right) + \log\left(\frac{p_{001} + p_{000}}{p_{011} + p_{010}}\right) \\ &= \beta_G + \log\left(\frac{\exp\{\beta_E + \beta_{GE}\}p_{011} + p_{010}}{\exp\{\beta_E\}p_{001} + p_{000}}\right) + \log\left(\frac{p_{001} + p_{000}}{p_{011} + p_{010}}\right) \end{aligned} \quad (\text{W1})$$

$$\begin{aligned} \alpha_E &= \log\left(\frac{p_{111} + p_{101}}{p_{110} + p_{100}}\right) + \log\left(\frac{p_{010} + p_{000}}{p_{011} + p_{001}}\right) \\ &= \log\left(\frac{\exp\{\beta_E + \beta_G + \beta_{GE}\}p_{011} + \exp\{\beta_E\}p_{001}}{\exp\{\beta_G\}p_{010} + p_{000}}\right) + \log\left(\frac{p_{010} + p_{000}}{p_{011} + p_{001}}\right) \\ &= \beta_E + \log\left(\frac{\exp\{\beta_G + \beta_{GE}\}p_{011} + p_{001}}{\exp\{\beta_G\}p_{010} + p_{000}}\right) + \log\left(\frac{p_{010} + p_{000}}{p_{011} + p_{001}}\right), \end{aligned} \quad (\text{W2})$$

Thus, the marginal log-ORs  $\alpha_G$  and  $\alpha_E$  can be written as functions of the control probability vector and the ORs  $\beta_G$ ,  $\beta_E$ , and  $\beta_{GE}$ , and specification of any three of  $\alpha_G$ ,  $\alpha_E$ ,  $\beta_G$ ,  $\beta_E$ , or  $\beta_{GE}$  determine the value of the remaining two.

Web Table 1: Simulation settings for additional GEI results, given in Web Figures 1–6 (top), and additional gene discovery results, given in Web Figures 7–9 (bottom)<sup>a</sup>

| Web Figure | range $\exp\{\beta_{GE}\}$ | $\beta_G$ | $P_E$ | $\alpha_E$ | $n_0, n_1$      | $p_{\text{ind}}$ | $\#\{\beta_G^{\text{NULL}} \neq 0\}$ |
|------------|----------------------------|-----------|-------|------------|-----------------|------------------|--------------------------------------|
| 1          | (1.00, 1.75)               | log(1.2)  | 0.3   | log(1.5)   | $2 \times 10^4$ | 0.995            | 0                                    |
| 2          | (1.00, 1.35)               | log(1.0)  | 0.3   | log(1.5)   | $2 \times 10^4$ | 0.995            | 0                                    |
| 3          | (1.00, 1.35)               | log(1.2)  | 0.3   | log(1.5)   | $10^4$          | 0.995            | 0                                    |
| 4          | (1.00, 1.35)               | log(1.2)  | 0.1   | log(1.75)  | $2 \times 10^4$ | 0.995            | 0                                    |
| 5          | (1.00, 1.75)               | log(1.2)  | 0.1   | log(1.75)  | $2 \times 10^4$ | 0.995            | 0                                    |
| 6          | (1.00, 1.35)               | log(1.2)  | 0.3   | log(1.5)   | $2 \times 10^4$ | 0.995            | 500                                  |
| 7          | (1.00, 1.75)               | log(1.0)  | 0.3   | log(1.5)   | $2 \times 10^4$ | –                | –                                    |
| 8          | (1.00, 1.35)               | log(1.2)  | 0.3   | log(1.5)   | $2 \times 10^4$ | –                | –                                    |
| 9          | (1.00, 1.75)               | log(1.0)  | 0.1   | log(1.75)  | $2 \times 10^4$ | –                | –                                    |

Abbreviations: GEI, gene-environment interaction.

<sup>a</sup> Those items in red indicate differences in settings from Figure 1 (GEI) or Figure 2 (gene discovery) in the main text. In regards to the last column, this gives the number of null markers, i.e.  $\beta_{GE} = 0$ , with genetic main effects sampled from  $\beta_G \sim \text{Unif}(\log(1.05), \log(1.2))$ . Each gene discovery method tests each marker independently. Thus, because we focus only on markers for which  $\beta_{GE} \neq 0$ , we do not need to consider parameters whose scope is limited to null markers, i.e.  $p_{\text{ind}}$  and  $\#\{\beta_G^{\text{NULL}} \neq 0\}$ .

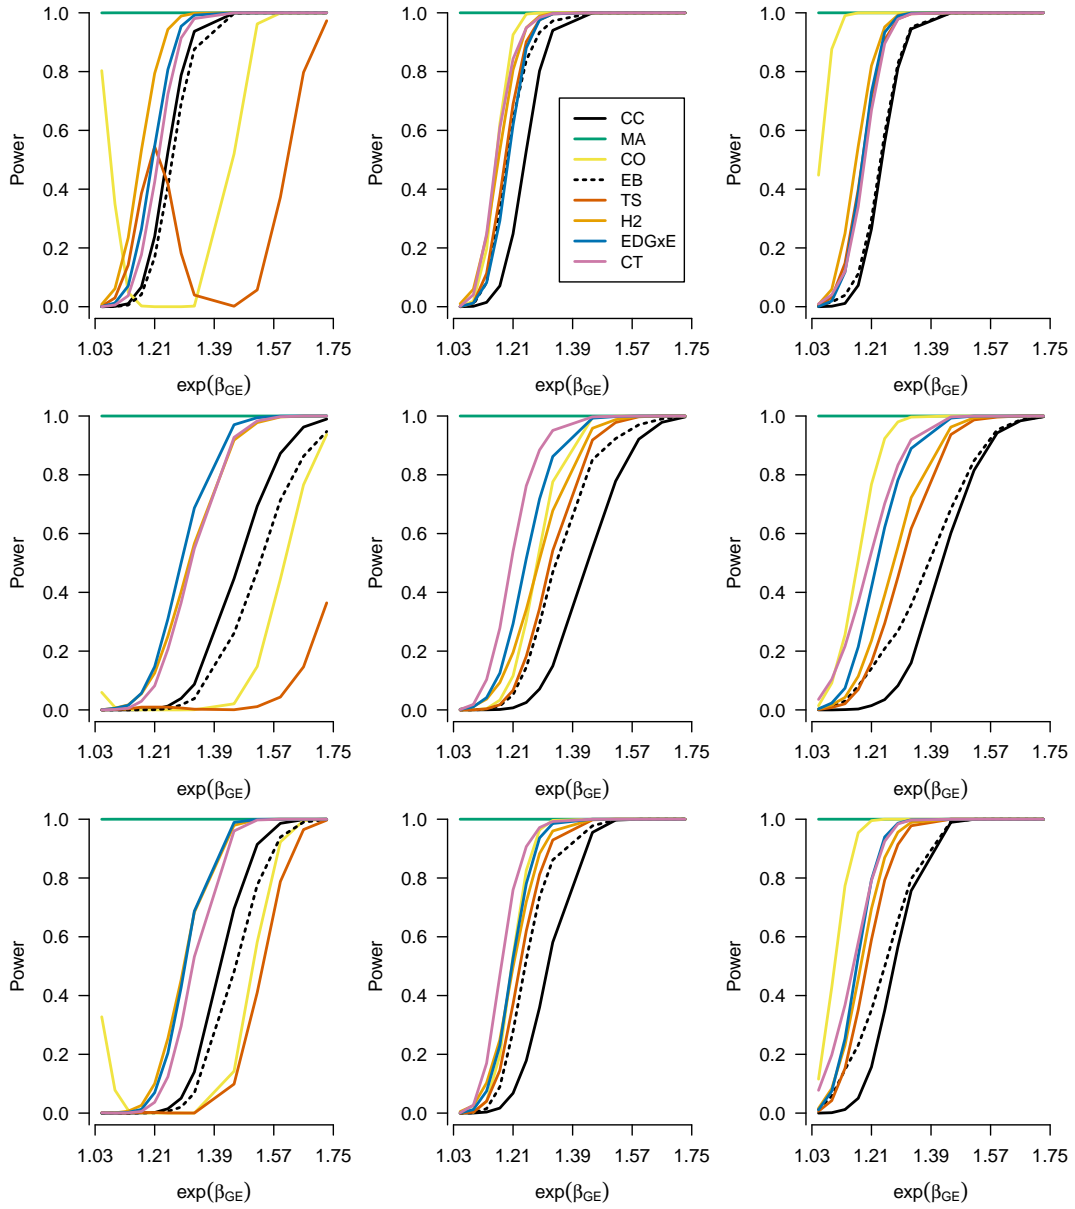

Web Figure 1: Empirical power to detect gene-environment interaction in one marker for 7 GEI methods (CC, case-control; CO, case-only; EB, empirical Bayes; TS, two-step gene-environment screening; H2, hybrid two-step; EDGxE, joint marginal/association screening; CT, cocktail) and the marginal (MA) method from 5,000 datasets with  $n = 20,000$  each of cases and controls and  $M = 100,000 - 1$  null genetic markers. From top to bottom, each row corresponds to perfect classification, non-differential misclassification (sensitivity and specificity of 0.8), and differential misclassification (sensitivity of 1 and specificity of 0.8 for cases and sensitivity and specificity of 0.8 for controls) of the exposure variable. From left to right, each column corresponds to  $\theta_{GE} = \log(0.8)$ ,  $\theta_{GE} = 0$ , and  $\theta_{GE} = \log(1.1)$ . The exposure prevalence was  $P_E = 0.3$  and the marginal exposure log-OR was  $\alpha_E = \log(1.5)$ . For the non-null marker, the main genetic log-OR was  $\beta_G = \log(1.2)$  and the carrier prevalence was  $P_G = 0.36$ . For each null marker,  $\beta_G = 0$  and  $P_G = f^2 + 2f(1 - f)$ , where  $f \sim \text{Unif}[0.1, 0.3]$  is the minor allele frequency. **These settings are identical to those of Figure 1 in the main text, but the range of  $\exp\{\beta_{GE}\}$  extends to 1.75**

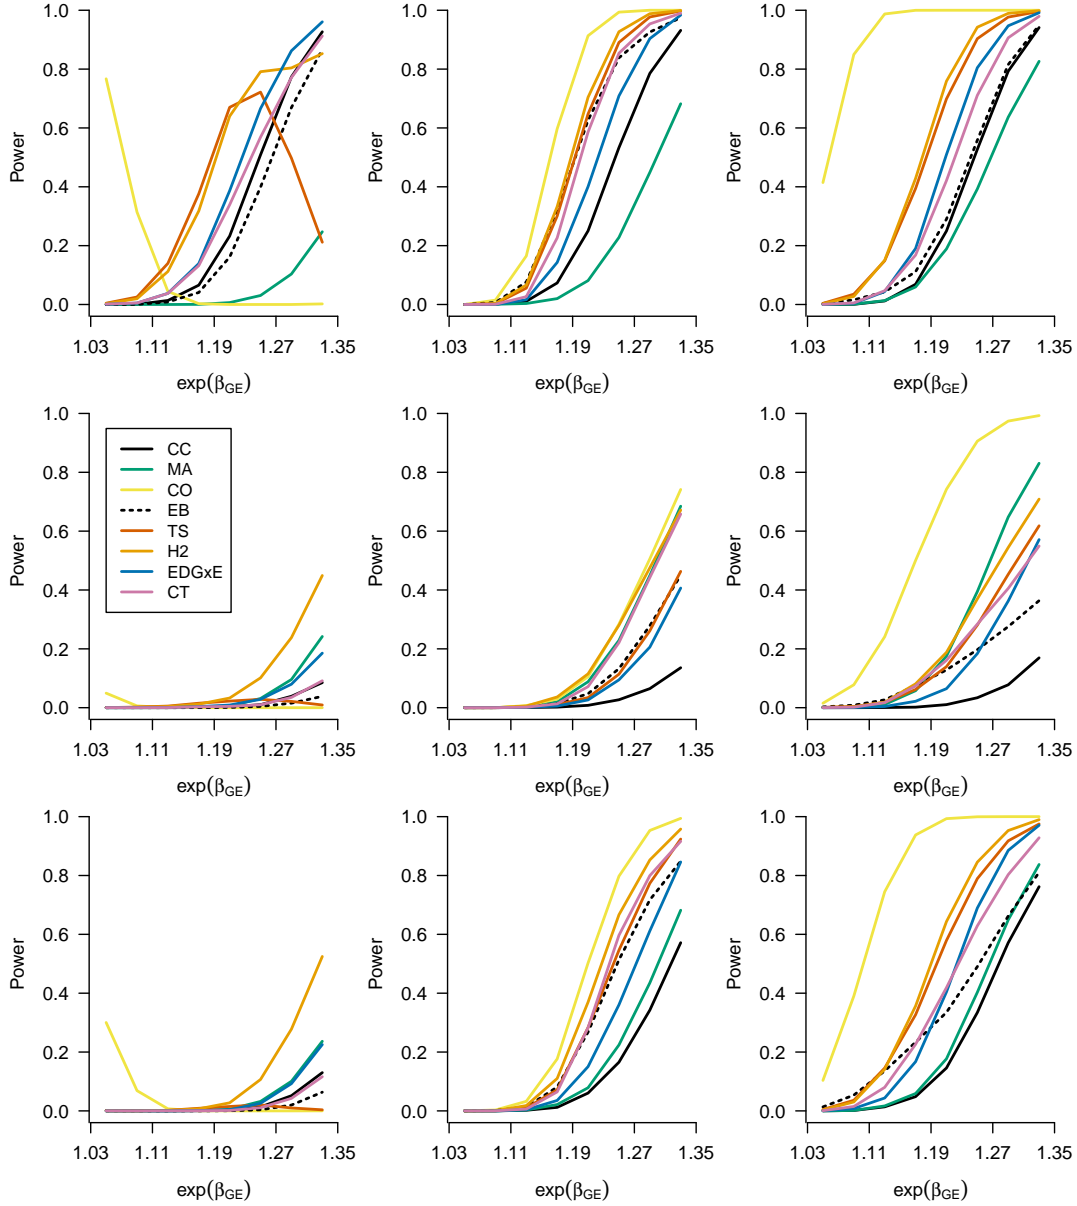

Web Figure 2: Empirical power to detect gene-environment interaction in one marker for 7 GEI methods (CC, case-control; CO, case-only; EB, empirical Bayes; TS, two-step gene-environment screening; H2, hybrid two-step; EDGxE, joint marginal/association screening; CT, cocktail) and the marginal (MA) method from 5,000 datasets with  $n = 20,000$  each of cases and controls and  $M = 100,000 - 1$  null genetic markers. From top to bottom, each row corresponds to perfect classification, non-differential misclassification (sensitivity and specificity of 0.8), and differential misclassification (sensitivity of 1 and specificity of 0.8 for cases and sensitivity and specificity of 0.8 for controls) of the exposure variable. From left to right, each column corresponds to  $\theta_{GE} = \log(0.8)$ ,  $\theta_{GE} = 0$ , and  $\theta_{GE} = \log(1.1)$ . The exposure prevalence was  $P_E = 0.3$  and the marginal exposure log-OR was  $\alpha_E = \log(1.5)$ . For the non-null marker, the main genetic log-OR was  $\beta_G = 0$  and the carrier prevalence was  $P_G = 0.36$ . For each null marker,  $\beta_G = 0$  and  $P_G = f^2 + 2f(1 - f)$ , where  $f \sim \text{Unif}[0.1, 0.3]$  is the minor allele frequency.

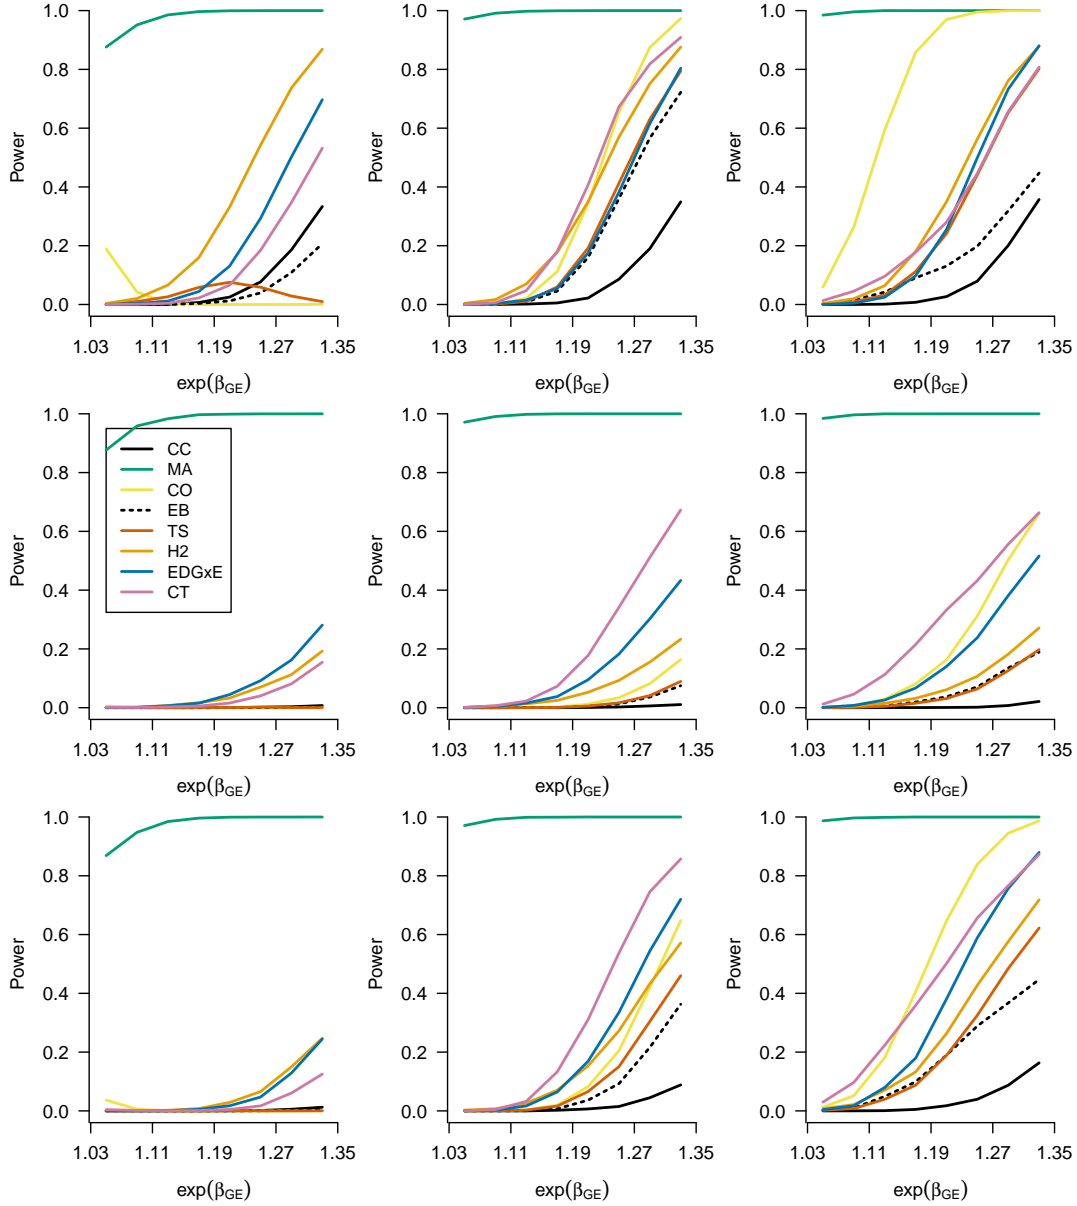

Web Figure 3: Empirical power to detect gene-environment interaction in one marker for 7 GEI methods (CC, case-control; CO, case-only; EB, empirical Bayes; TS, two-step gene-environment screening; H2, hybrid two-step; EDGxE, joint marginal/association screening; CT, cocktail) and the marginal (MA) method from 5,000 datasets with  $n = 10,000$  each of cases and controls and  $M = 100,000 - 1$  null genetic markers. From top to bottom, each row corresponds to perfect classification, non-differential misclassification (sensitivity and specificity of 0.8), and differential misclassification (sensitivity of 1 and specificity of 0.8 for cases and sensitivity and specificity of 0.8 for controls) of the exposure variable. From left to right, each column corresponds to  $\theta_{GE} = \log(0.8)$ ,  $\theta_{GE} = 0$ , and  $\theta_{GE} = \log(1.1)$ . The exposure prevalence was  $P_E = 0.3$  and the marginal exposure log-OR was  $\alpha_E = \log(1.5)$ . For the non-null marker, the main genetic log-OR was  $\beta_G = \log(1.2)$  and the carrier prevalence was  $P_G = 0.36$ . For each null marker,  $\beta_G = 0$  and  $P_G = f^2 + 2f(1 - f)$ , where  $f \sim \text{Unif}[0.1, 0.3]$  is the minor allele frequency.

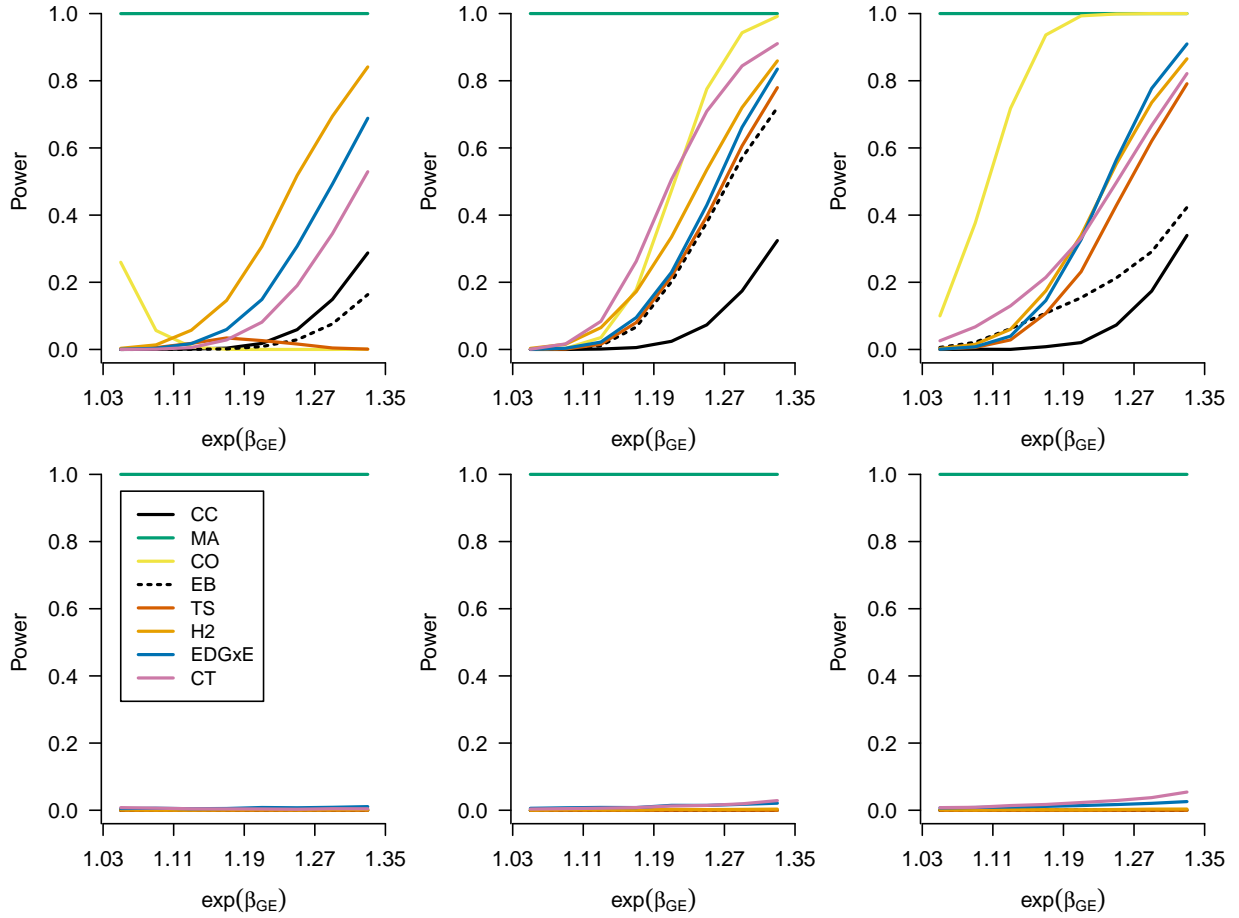

Web Figure 4: Empirical power to detect gene-environment interaction in one marker for 7 GEI methods (CC, case-control; CO, case-only; EB, empirical Bayes; TS, two-step gene-environment screening; H2, hybrid two-step; EDGxE, joint marginal/association screening; CT, cocktail) and the marginal (MA) method from 5,000 datasets with  $n = 20,000$  each of cases and controls and  $M = 100,000 - 1$  null genetic markers. From top to bottom, each row corresponds to perfect classification, non-differential misclassification (sensitivity and specificity of 0.8), and differential misclassification (sensitivity of 1 and specificity of 0.8 for cases and sensitivity and specificity of 0.8 for controls) of the exposure variable. From left to right, each column corresponds to  $\theta_{GE} = \log(0.8)$ ,  $\theta_{GE} = 0$ , and  $\theta_{GE} = \log(1.1)$ . The exposure prevalence was  $P_E = 0.1$  and the marginal exposure log-OR was  $\alpha_E = \log(1.75)$ . For the non-null marker, the main genetic log-OR was  $\beta_G = \log(1.2)$  and the carrier prevalence was  $P_G = 0.36$ . For each null marker,  $\beta_G = 0$  and  $P_G = f^2 + 2f(1 - f)$ , where  $f \sim \text{Unif}[0.1, 0.3]$  is the minor allele frequency.

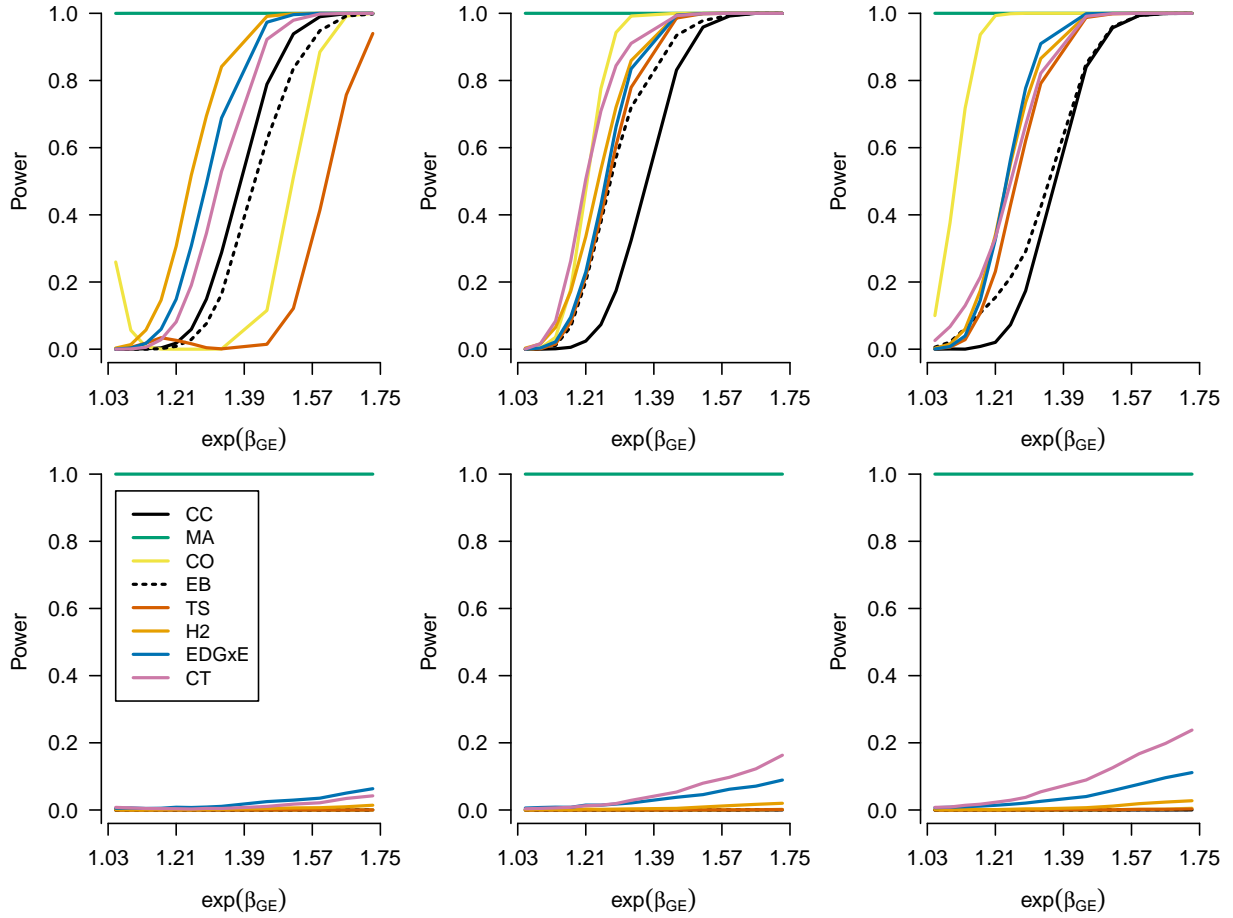

Web Figure 5: Empirical power to detect gene-environment interaction in one marker for 7 GEI methods (CC, case-control; CO, case-only; EB, empirical Bayes; TS, two-step gene-environment screening; H2, hybrid two-step; EDGxE, joint marginal/association screening; CT, cocktail) and the marginal (MA) method from 5,000 datasets with  $n = 20,000$  each of cases and controls and  $M = 100,000 - 1$  null genetic markers. From top to bottom, each row corresponds to perfect classification, non-differential misclassification (sensitivity and specificity of 0.8), and differential misclassification (sensitivity of 1 and specificity of 0.8 for cases and sensitivity and specificity of 0.8 for controls) of the exposure variable. From left to right, each column corresponds to  $\theta_{GE} = \log(0.8)$ ,  $\theta_{GE} = 0$ , and  $\theta_{GE} = \log(1.1)$ . The exposure prevalence was  $P_E = 0.1$  and the marginal exposure log-OR was  $\alpha_E = \log(1.75)$ . For the non-null marker, the main genetic log-OR was  $\beta_G = \log(1.2)$  and the carrier prevalence was  $P_G = 0.36$ . For each null marker,  $\beta_G = 0$  and  $P_G = f^2 + 2f(1 - f)$ , where  $f \sim \text{Unif}[0.1, 0.3]$  is the minor allele frequency. **These settings are identical to those of Figure 4, but the range of  $\exp\{\beta_{GE}\}$  extends to 1.75.**



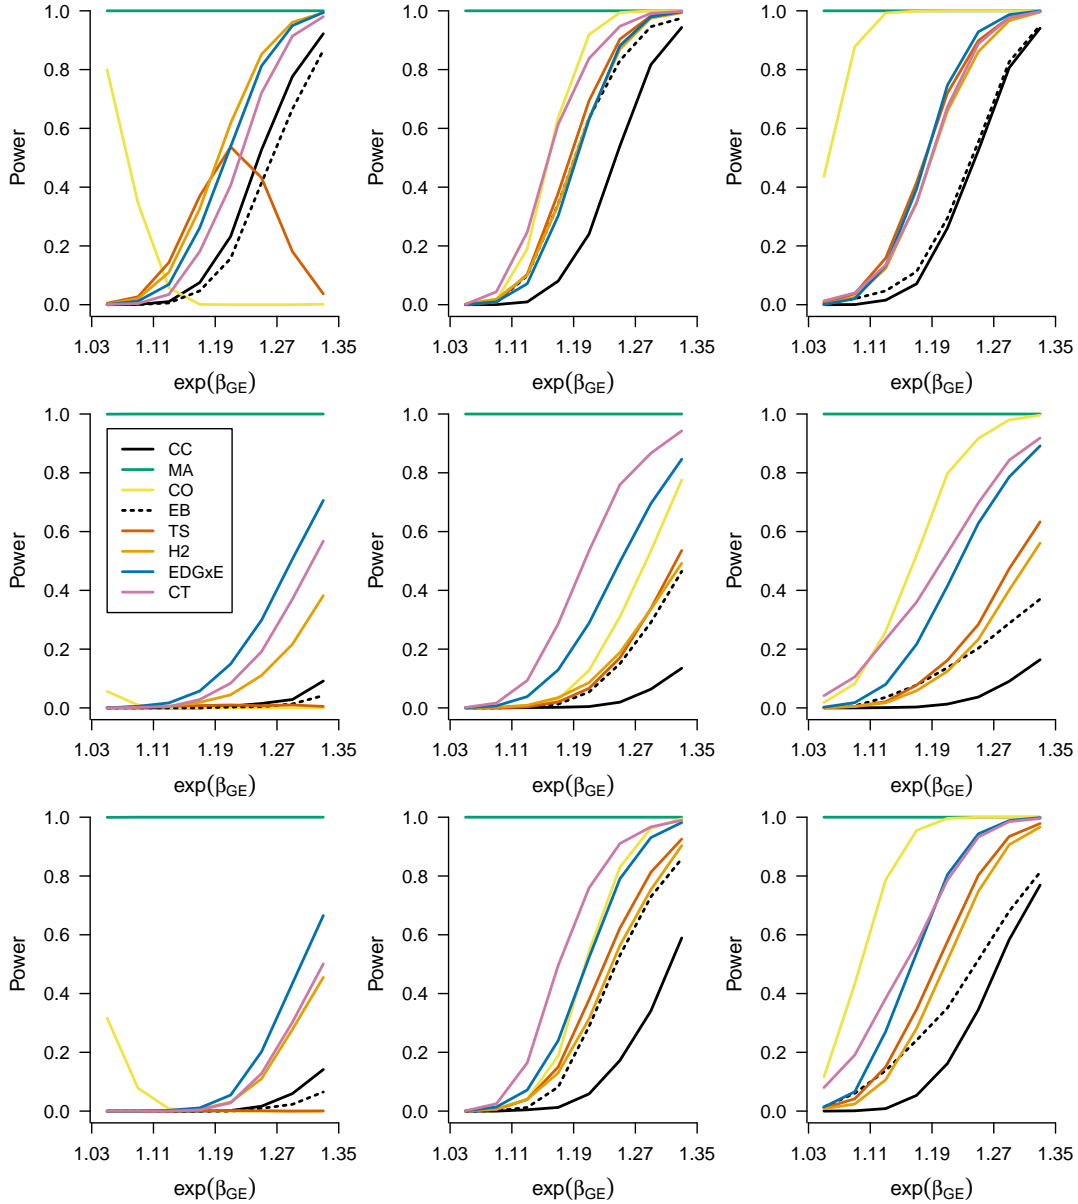

Web Figure 6: Empirical power to detect gene-environment interaction in one marker for 7 GEI methods (CC, case-control; CO, case-only; EB, empirical Bayes; TS, two-step gene-environment screening; H2, hybrid two-step; EDGxE, joint marginal/association screening; CT, cocktail) and the marginal (MA) method from 5,000 datasets with  $n = 20,000$  each of cases and controls and  $M = 100,000 - 1$  null genetic markers. From top to bottom, each row corresponds to perfect classification, non-differential misclassification (sensitivity and specificity of 0.8), and differential misclassification (sensitivity of 1 and specificity of 0.8 for cases and sensitivity and specificity of 0.8 for controls) of the exposure variable. From left to right, each column corresponds to  $\theta_{GE} = \log(0.8)$ ,  $\theta_{GE} = 0$ , and  $\theta_{GE} = \log(1.1)$ . The exposure prevalence was  $P_E = 0.3$  and the marginal exposure log-OR was  $\alpha_E = \log(1.5)$ . For the non-null marker, the main genetic log-OR was  $\beta_G = \log(1.2)$  and the carrier prevalence was  $P_G = 0.36$ . For 500 null markers,  $\beta_G \sim \text{Unif}[\log(1.05), \log(1.2)]$ , with  $\beta_G = 0$  for the remainder. For all null markers,  $P_G = f^2 + 2f(1 - f)$ , where  $f \sim \text{Unif}[0.1, 0.3]$  is the minor allele frequency.

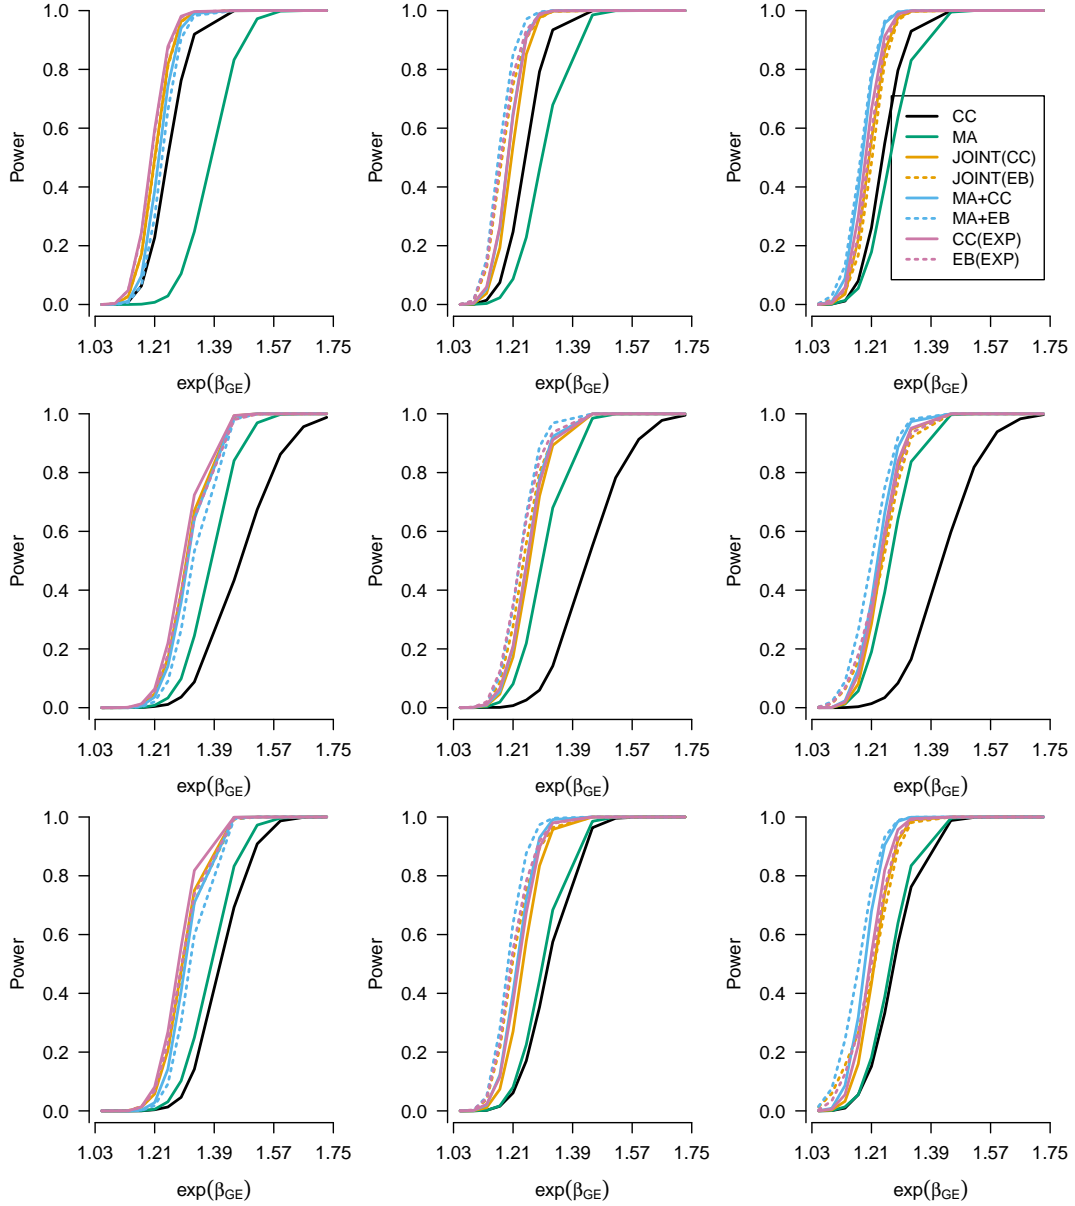

Web Figure 7: Empirical power for discovery of one marker for the case-control method (CC) and 7 gene discovery methods (MA, marginal; JOINT(CC), 2-DF joint test; JOINT(EB), empirical Bayes 2-DF joint test; MA+CC, marginal + CC; MA+EB, marginal + empirical Bayes; CC(EXP), CC applied to exposed subgroup; EB(EXP), empirical Bayes applied to exposed subgroup) from 5,000 datasets with  $n = 20,000$  each of cases and controls. From top to bottom, each row corresponds to perfect classification, non-differential misclassification (sensitivity and specificity of 0.8), and differential misclassification (sensitivity of 1 and specificity of 0.8 for cases and sensitivity and specificity of 0.8 for controls) of the exposure variable. From left to right, each column corresponds to  $\theta_{GE} = \log(0.8)$ ,  $\theta_{GE} = 0$ , and  $\theta_{GE} = \log(1.1)$ . The exposure prevalence was  $P_E = 0.3$  and the marginal exposure log-OR was  $\alpha_E = \log(1.5)$ . The main genetic log-OR was  $\beta_G = 0$  and the carrier prevalence was  $P_G = 0.36$ . **These settings are identical to those of Figure 2 in the main text, but the range of  $\exp\{\beta_{GE}\}$  extends to 1.75.**

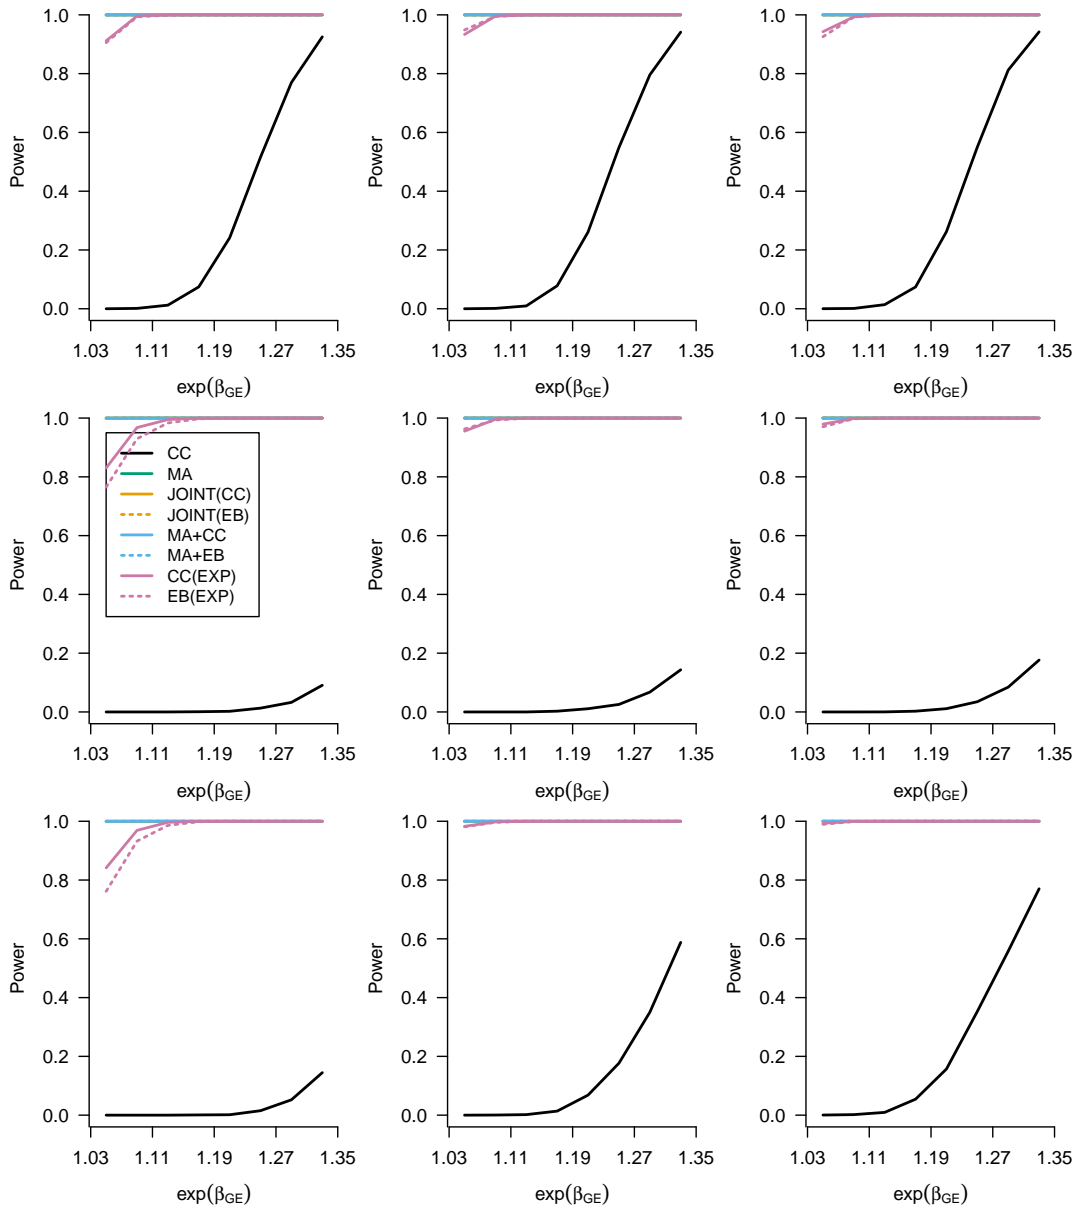

Web Figure 8: Empirical power for discovery of one marker for the case-control method (CC) and 7 gene discovery methods (MA, marginal; JOINT(CC), 2-DF joint test; JOINT(EB), empirical Bayes 2-DF joint test; MA+CC, marginal + CC; MA+EB, marginal + empirical Bayes; CC(EXP), CC applied to exposed subgroup; EB(EXP), empirical Bayes applied to exposed subgroup) from 5,000 datasets with  $n = 20,000$  each of cases and controls. From top to bottom, each row corresponds to perfect classification, non-differential misclassification (sensitivity and specificity of 0.8), and differential misclassification (sensitivity of 1 and specificity of 0.8 for cases and sensitivity and specificity of 0.8 for controls) of the exposure variable. From left to right, each column corresponds to  $\theta_{GE} = \log(0.8)$ ,  $\theta_{GE} = 0$ , and  $\theta_{GE} = \log(1.1)$ . The exposure prevalence was  $P_E = 0.3$  and the marginal exposure log-OR was  $\alpha_E = \log(1.5)$ . The main genetic log-OR was  $\beta_G = \log(1.2)$  and the carrier prevalence was  $P_G = 0.36$ .

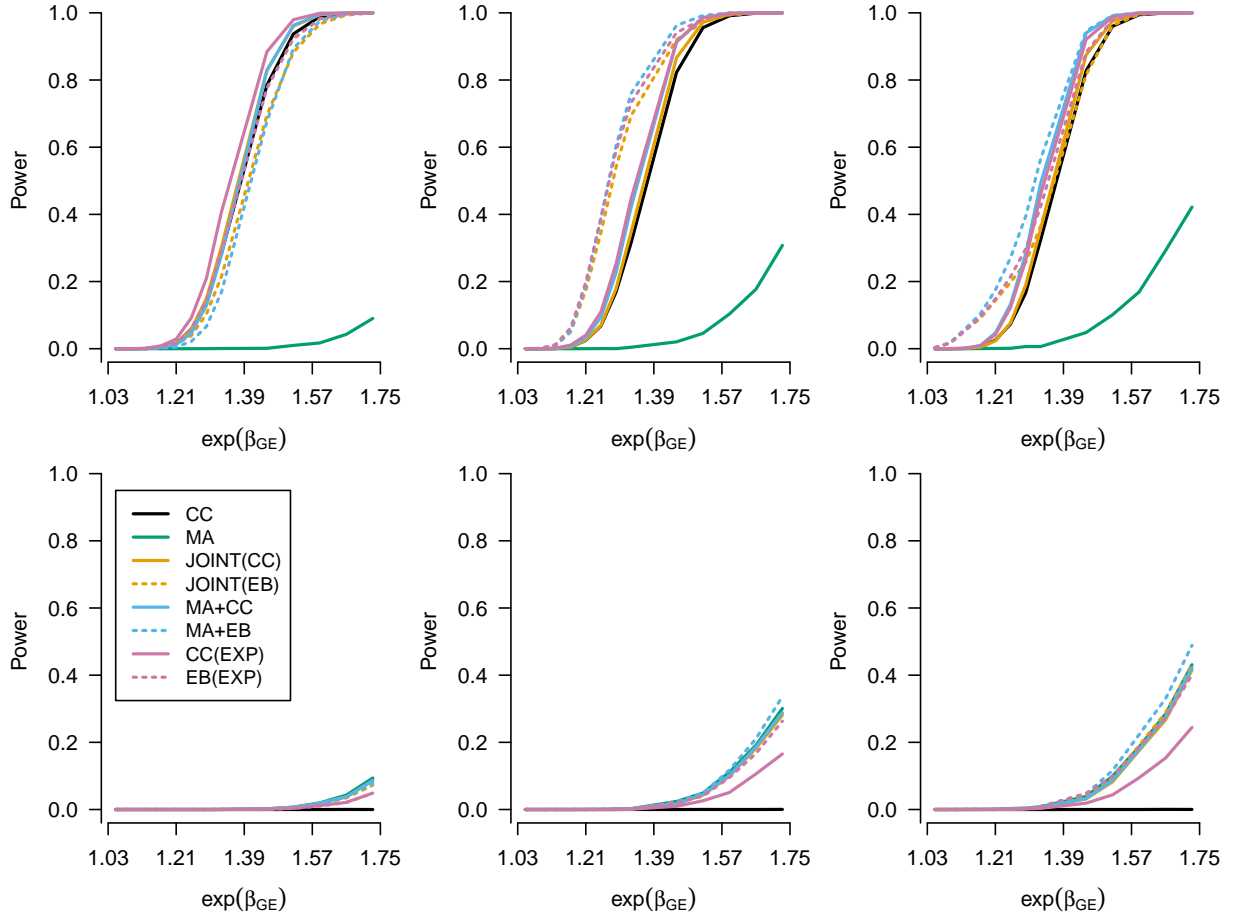

Web Figure 9: Empirical power for discovery of one marker for the case-control method (CC) and 7 gene discovery methods (MA, marginal; JOINT(CC), 2-DF joint test; JOINT(EB), empirical Bayes 2-DF joint test; MA+CC, marginal + CC; MA+EB, marginal + empirical Bayes; CC(EXP), CC applied to exposed subgroup; EB(EXP), empirical Bayes applied to exposed subgroup) from 5,000 datasets with  $n = 20,000$  each of cases and controls. From top to bottom, each row corresponds to perfect classification, non-differential misclassification (sensitivity and specificity of 0.8), and differential misclassification (sensitivity of 1 and specificity of 0.8 for cases and sensitivity and specificity of 0.8 for controls) of the exposure variable. From left to right, each column corresponds to  $\theta_{GE} = \log(0.8)$ ,  $\theta_{GE} = 0$ , and  $\theta_{GE} = \log(1.1)$ . The exposure prevalence was  $P_E = 0.1$  and the marginal exposure log-OR was  $\alpha_E = \log(1.75)$ . The main genetic log-OR was  $\beta_G = 0$  and the carrier prevalence was  $P_G = 0.36$ .
